# Supplementary material for: Antinociceptive and Antibacterial Properties of Anthocyanins and Flavonols from Fruits of Black and Non-Black Mulberries
Source: PubMed Central journal article supplement (PMC5943937; doi:10.3390/molecules23010004), 2017-12-21

**Supplementary Materials:**
**Table S1. Data of antinociceptive activities in mice.**

| Antinociceptive activities of |            | Control | Asp   | Dex    | MnTF   | MmTF    | MazTF |
|-------------------------------|------------|---------|-------|--------|--------|---------|-------|
|                               |            | (s)     |       |        |        |         |       |
| MnTF, MmTF, and MazTF         | 0-5 min    | 59±12   | 30±14 | 50±7   | 49±17  | 50±25   | 51±13 |
|                               | 15-30 min  | 122±49  | 16±18 | 54±28  | 60±20  | 140±121 | 48±52 |
|                               | Total time | 181±42  | 46±25 | 104±28 | 109±30 | 190±123 | 99±60 |

  

| Antinociceptive activities of |            | Control | Asp   | Dex   | C3G   | Ru    | IQ    | Mix   |
|-------------------------------|------------|---------|-------|-------|-------|-------|-------|-------|
|                               |            | (s)     |       |       |       |       |       |       |
| C3G, Ru, and IQ               | 0-5 min    | 33±14   | 35±4  | 28±13 | 30±13 | 32±20 | 28±11 | 21±15 |
|                               | 15-30 min  | 55±14   | 9±13  | 14±16 | 38±17 | 61±25 | 48±17 | 20±12 |
|                               | Total time | 88±20   | 44±15 | 42±25 | 68±28 | 93±45 | 76±10 | 41±11 |

**Figure S1: Spectra of anthocyanins and flavonols by UPLC-TUV/QDa.**
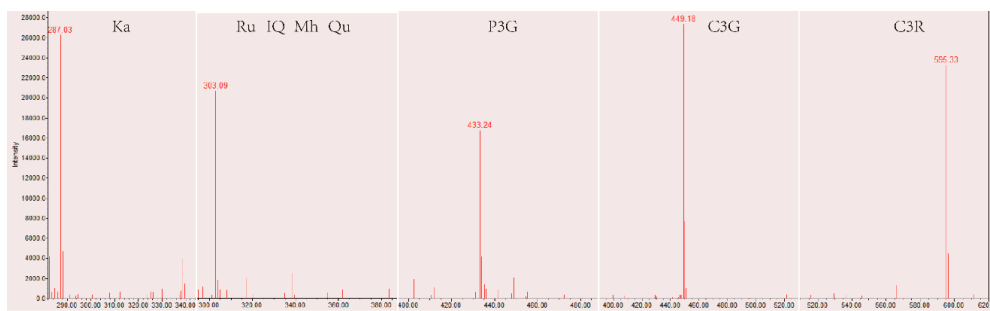
**Figure S2. Western blotting of TFs on the expression of inflammation-related proteins. The grayscale of  $\beta$ -actin is set to 1, and the other groups use it as a reference.**
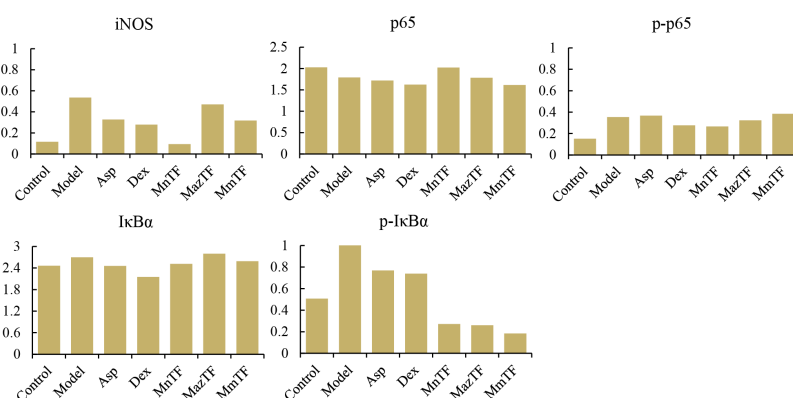
**Figure S3: Schematic representation of the inhibitory effect of MnTF on the cytokines, NF- $\kappa$ B, and NO pathways in RAW 264.7 cells.**

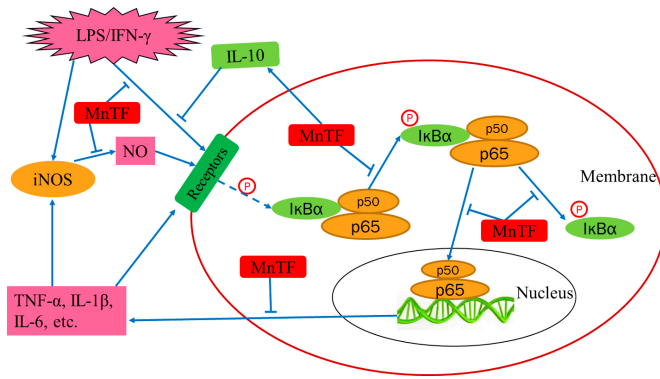

Figure S4: MBC of MnTF against *E. coli* (a), *P. aeruginosa* (b), and *S. aureus* (c) shown by absorbance. Data are means  $\pm$  SD ( $n = 3$ ). Values with asterisks (\*\*) are significantly different ( $p < 0.01$ ) from values in the control group.

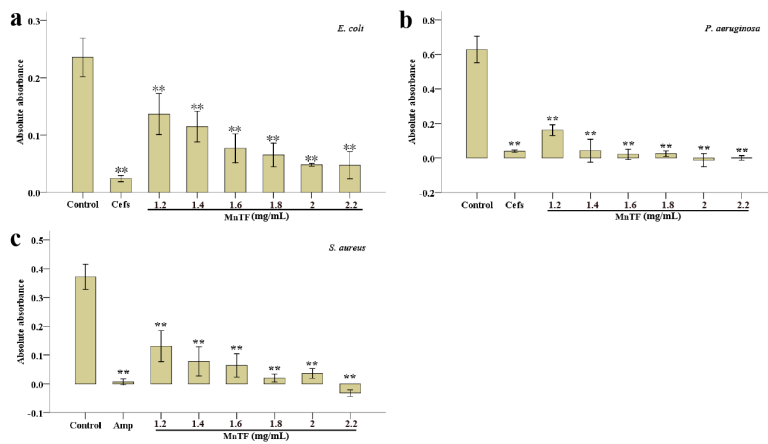

Supplement: molecules-23-00004-s001.pdf [file molecules-23-00004-s001.pdf]
